# Supplementary material
Source: PubMed Central journal article supplement (PMC4399055)
Supplement: IAI.03097-14_zii999091184so1.pdf [file IAI.03097-14_zii999091184so1.pdf]

## Supplemental Materials

Motor rotation is essential for the formation of the periplasmic flagellar ribbon, cellular morphology, and *Borrelia burgdorferi* persistence within *Ixodes* tick and murine hosts

Syed Z. Sultan<sup>1</sup>, Padmapriya Sekar<sup>2</sup>, Xiaowei Zhao<sup>3</sup>, Akarsh Manne<sup>1</sup>, Jun Liu<sup>3</sup>, R. Mark Wooten<sup>2</sup> and Md. A. Motaleb<sup>1</sup>

<sup>1</sup>Department of Microbiology and Immunology, Brody School of Medicine, East Carolina University, 600 Moye Blvd., Greenville, NC 27834.

<sup>2</sup>Department of Medical Microbiology and Immunology, University of Toledo College of Medicine, Toledo, Ohio 43614.

<sup>3</sup>Department of Pathology and Laboratory Medicine, University of Texas Medical School at Houston, 6431 Fannin Street, MSB 2.228, Houston, TX 77030.

\*Corresponding author:

Email: [motalebm@ecu.edu](mailto:motalebm@ecu.edu)

Phone: 252-744-3129

Fax: 252-744-3535.

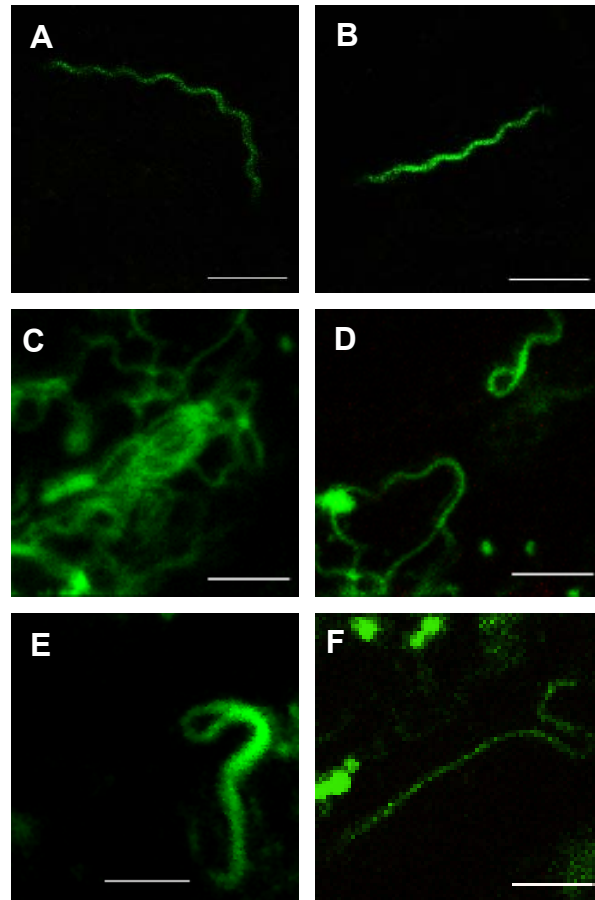

**Figure S1. Morphology of WT and  $\Delta motB$  spirochetes within mouse skin tissue.**  $10^6$  B31-A3-GFP (WT) or  $\Delta motB$ -GFP (mutant) bacteria were injected intradermally into murine ear skin and imaged within 6 h post-injection. At least 10 infected mouse ears were imaged for each *B. burgdorferi* strain. Representative images of WT (A-B) and  $\Delta motB$  (C-F) *B. burgdorferi* collected near the injection site at 20-25  $\mu\text{m}$  deep from the ear surface. Scale bar, 5  $\mu\text{m}$ .

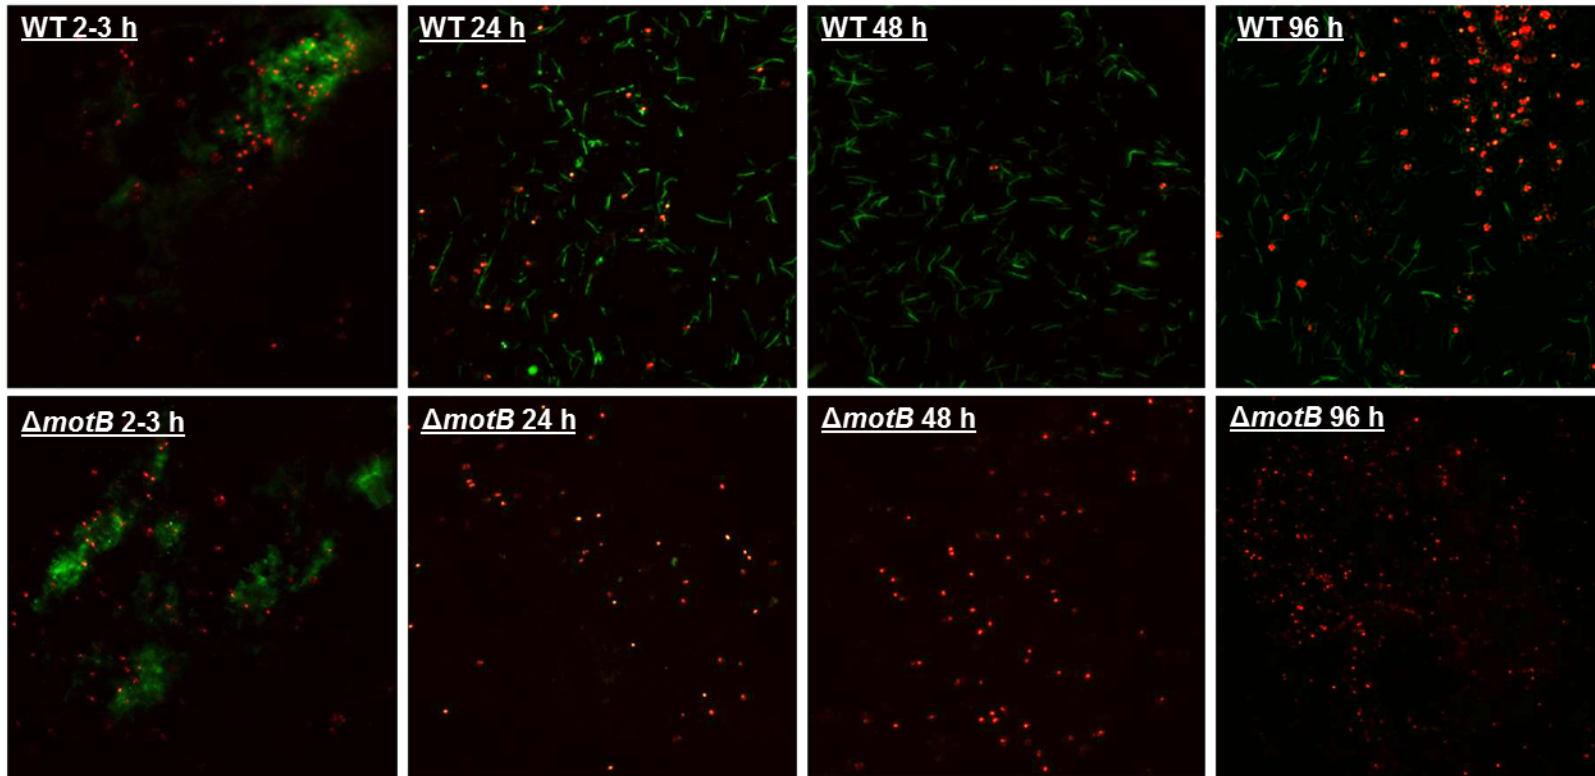

**Figure S2. Intravital confocal microscopy of WT and  $\Delta$ *motB* clearance kinetics in ear skin.**  $10^6$  B31-A3-GFP (WT-GFP) or  $\Delta$ *motB*-GFP bacteria were injected intradermally into murine ear skin along with  $10^5$  red-fluorescent latex beads and imaged at 3, 24, 48, and 96 h post-injection. Images were collected at 40x magnification and 20-25  $\mu$ m deep from the ear surface. At least four infected ears were imaged at each time-point for these representative pictures.

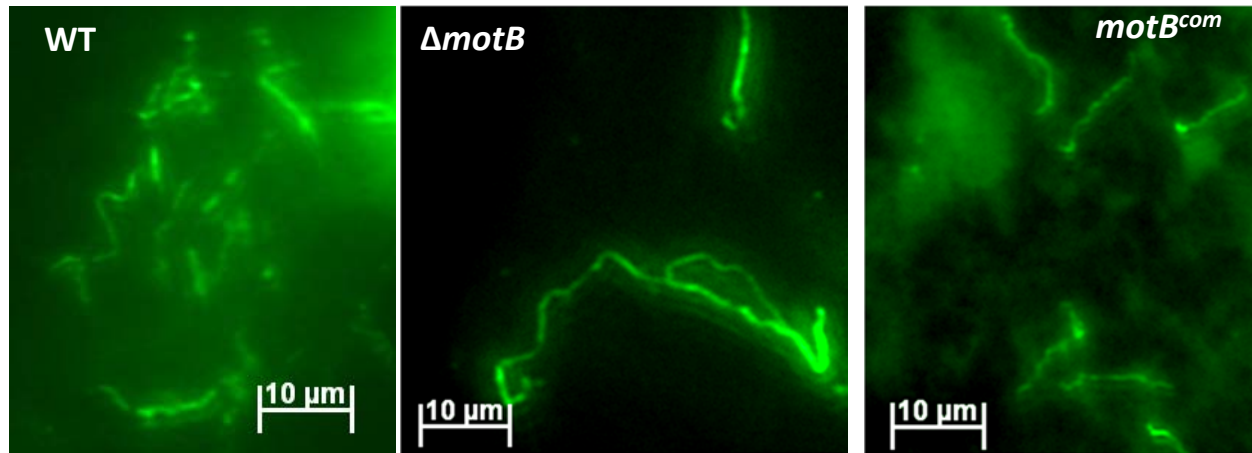

**Figure S3. Morphology of WT,  $\Delta$ *motB*, and the complemented *motB<sup>com</sup>* within larval tick mid-guts.** Tick larvae were infected with the indicated *B. burgdorferi* strain via immersion and subsequently allowed to feed to repletion on naive mice. Seven days post-feeding, ticks were squashed individually and midguts examined for spirochetes by staining with FITC-labeled *B. burgdorferi*-specific antibodies and fluorescence microscopy. These images are representative of those acquired for at least 5 larvae for each *B. burgdorferi* strain.
